# Supplementary material for: Identification and Biochemical Characterization of Halisulfate 3 and Suvanine as Novel Inhibitors of Hepatitis C Virus NS3 Helicase from a Marine Sponge
Source: PubMed Central journal article supplement (PMC3917281; doi:10.3390/md12010462), 2014-01-21
Supplement: marinedrugs-12-00462-s001.pdf [file marinedrugs-12-00462-s001.pdf]

# Supplementary Information

Figure S1.  $^1\text{H}$  (A) and  $^{13}\text{C}$  (B) NMR spectra of halisulfate 3 in MeOD.

A

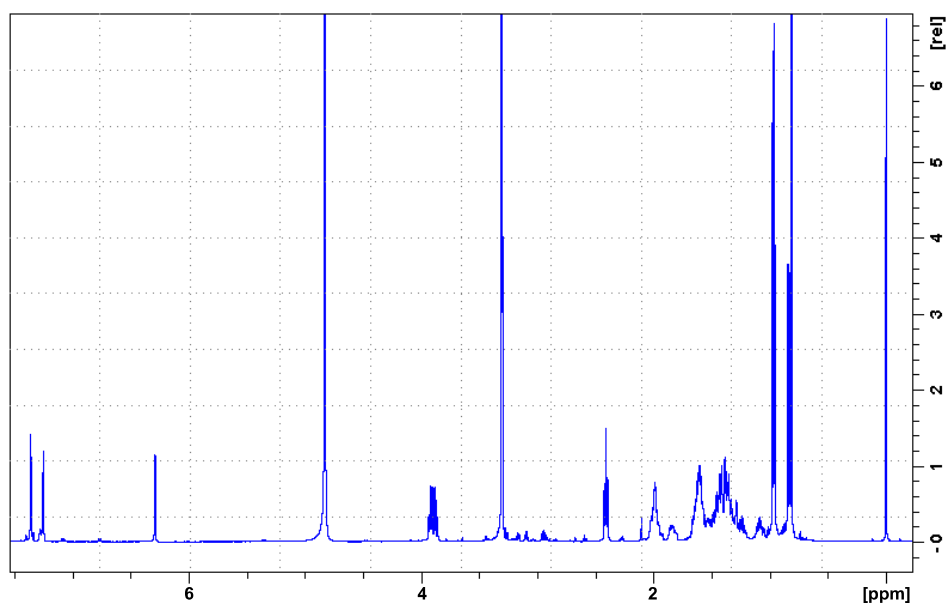

B

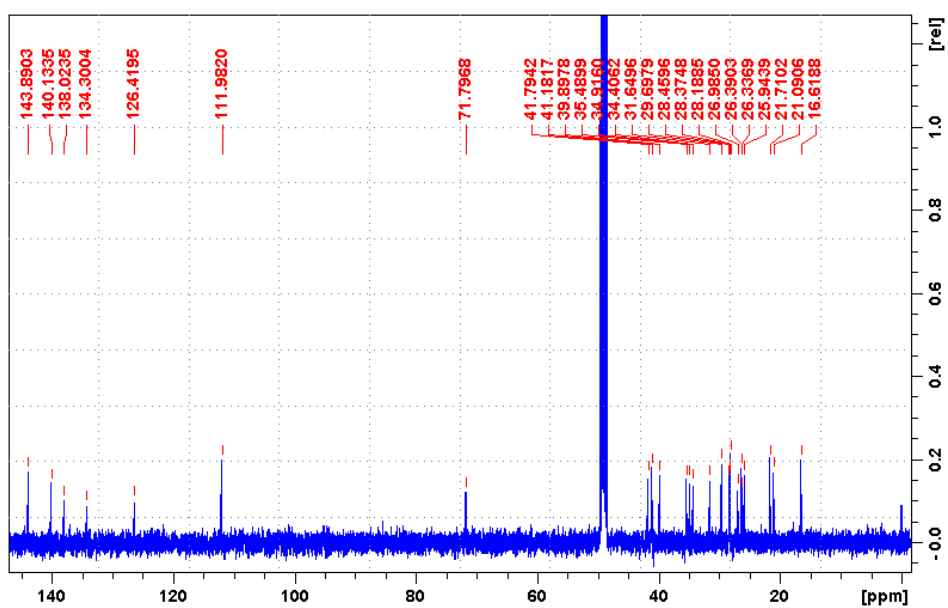

**Figure S2.**  $^1\text{H}$  (A) and  $^{13}\text{C}$  (B) NMR spectra of suvanine in  $\text{CDCl}_3$ . The signal at  $\delta$  3.5 in the  $^1\text{H}$  NMR spectra (A) is from residual methanol.

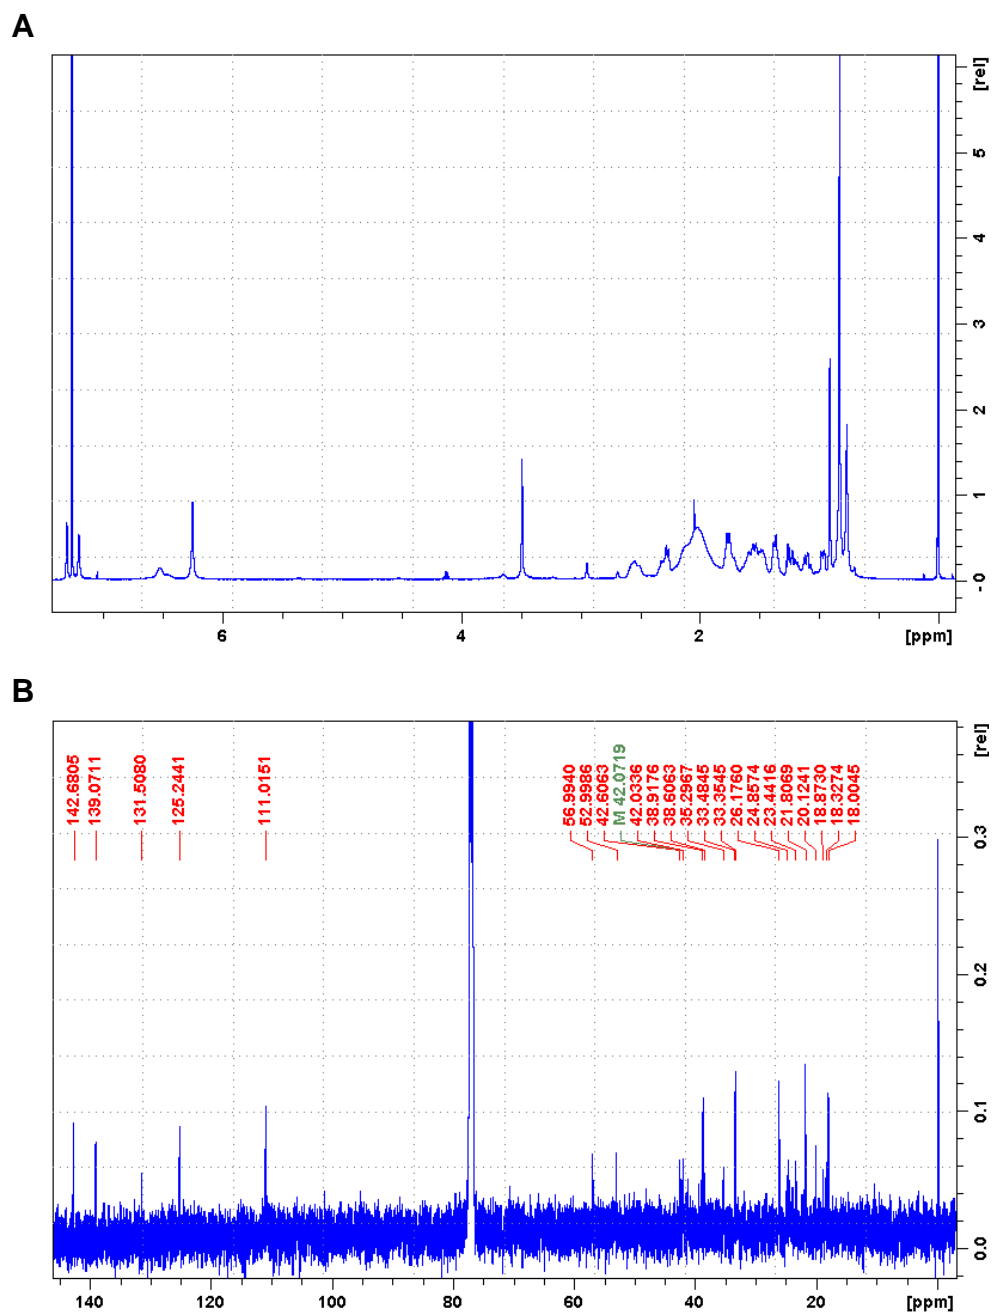

**Figure S3.**  $^1\text{H}$  and  $^{13}\text{C}$  NMR spectral data for halisulfate 3 in MeOD.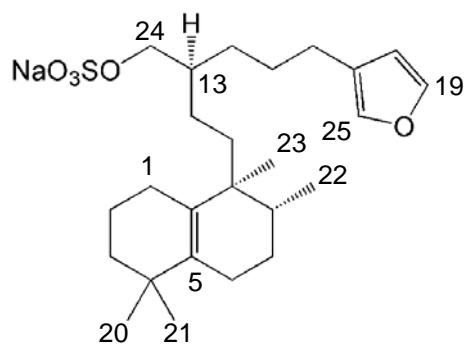

Halisulfate 3

| C# | $^1\text{H}$ NMR (MeOD) |                    | $^{13}\text{C}$ NMR (MeOD) |          |
|----|-------------------------|--------------------|----------------------------|----------|
|    | Reference [31]          | Isolated           | Reference [31]             | Isolated |
| 1  |                         |                    | 26.3                       | 26.4 t   |
| 2  |                         |                    | 21.0                       | 21.1 t   |
| 3  |                         |                    | 41.1                       | 41.2 t   |
| 4  |                         |                    | 35.4                       | 35.5 s   |
| 5  |                         |                    | 134.2                      | 134.3 s  |
| 6  |                         |                    | 26.2                       | 26.3 t   |
| 7  |                         |                    | 28.1                       | 28.2 t   |
| 8  |                         |                    | 34.9                       | 34.9 d   |
| 9  |                         |                    | 41.7                       | 41.8 s   |
| 10 |                         |                    | 138.0                      | 138.0 s  |
| 11 |                         |                    | 31.6                       | 31.6 t   |
| 12 |                         |                    | 25.9                       | 25.9 t   |
| 13 |                         |                    | 39.8                       | 39.9 d   |
| 14 |                         |                    | 34.3                       | 34.4 t   |
| 15 |                         |                    | 28.3                       | 28.4 t   |
| 16 | 2.34 t, J = 7 Hz        | 2.40 t, J = 7.4 Hz | 26.9                       | 27.0 t   |
| 17 |                         |                    | 126.3                      | 126.4 s  |
| 18 | 6.24 s                  | 6.29 s             | 111.9                      | 112.0 d  |
| 19 | 7.32 s                  | 7.36 brs           | 143.9                      | 143.9 d  |
| 20 | 0.93 s                  | 0.97 s             | 29.6                       | 29.7 q   |
| 21 | 0.91 s                  | 0.96 s             | 21.7                       | 21.7 q   |
| 22 | 0.80 d, J = 7.5 Hz      | 0.83 d, J = 7.0 Hz | 28.4                       | 28.5 q   |
| 23 | 0.77 s                  | 0.81 s             | 16.6                       | 16.6 q   |
| 24 | 3.86 m                  | 3.89 m             | 71.9                       | 71.8 t   |
| 25 | 7.21 s                  | 7.25 s             | 140.0                      | 140.1 d  |

**Figure S4.**  $^1\text{H}$  and  $^{13}\text{C}$  NMR spectral data for suvanine in  $\text{CDCl}_3$ .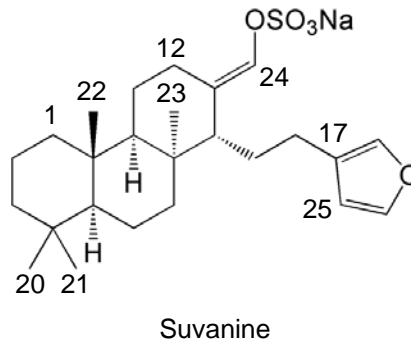

| C# | $^1\text{H}$ NMR ( $\text{CDCl}_3$ ) |                  | $^{13}\text{C}$ NMR ( $\text{CDCl}_3$ ) |          |
|----|--------------------------------------|------------------|-----------------------------------------|----------|
|    | Reference [32]                       | Isolated         | Reference [32]                          | Isolated |
| 1  |                                      |                  | 42.0 t                                  | 42.0 t   |
| 2  |                                      |                  | 18.4 t                                  | 18.3 t   |
| 3  |                                      |                  | 42.0 t                                  | 42.1 t   |
| 4  |                                      |                  | 33.5 s                                  | 33.4 s   |
| 5  |                                      |                  | 53.0 d                                  | 53.0 d   |
| 6  |                                      |                  | 18.9 t                                  | 18.9 t   |
| 7  |                                      |                  | 35.4 t                                  | 35.3 t   |
| 8  |                                      |                  | 39.9 s                                  | 38.9 s   |
| 9  | 0.85 m                               | 0.84 m           | 57.0 d                                  | 57.0 d   |
| 10 |                                      |                  | 38.6 s                                  | 38.6 s   |
| 11 |                                      |                  | 20.2 t                                  | 20.1 t   |
| 12 |                                      |                  | 24.9 t                                  | 24.9 t   |
| 13 |                                      |                  | 125.2 s                                 | 125.2 s  |
| 14 | 2.29 d                               | 2.27 d           | 42.6 d                                  | 42.6 d   |
| 15 |                                      |                  | 26.2 t                                  | *        |
| 16 | 2.53 m<br>2.32 ddd                   | 2.54 m<br>2.32 m | 23.5 t                                  | 23.4 t   |
| 17 |                                      |                  | 126.7 s                                 | *        |
| 18 | 6.32 s                               | 6.24 brs         | 111.0 d                                 | 111.0 d  |
| 19 | 7.23 s                               | 7.20 s           | 142.6 d                                 | 142.7 d  |
| 20 | 0.83 s                               | 0.82 s           | 33.4 q                                  | 33.5 q   |
| 21 | 0.83 s                               | 0.82 s           | 21.8 q                                  | 21.8 q   |
| 22 | 0.92 s                               | 0.91 s           | 18.1 q                                  | 18.0 q   |
| 23 | 0.77 s                               | 0.76 s           | 26.2 q                                  | 26.2 q   |
| 24 | 6.29 s                               | 6.24 brs         | 131.6 d                                 | 131.5 d  |
| 25 | 7.34 s                               | 7.30 s           | 139.0 d                                 | 139.1 d  |

\* Not observed (probably due to short of scans)
